# Supplementary material
Source: PubMed Central journal article supplement (PMC9556489)
Supplement: ajtr0014-5982-f11.pdf [file ajtr0014-5982-f11.pdf]

# Immune ferroptosis gene in KIRC

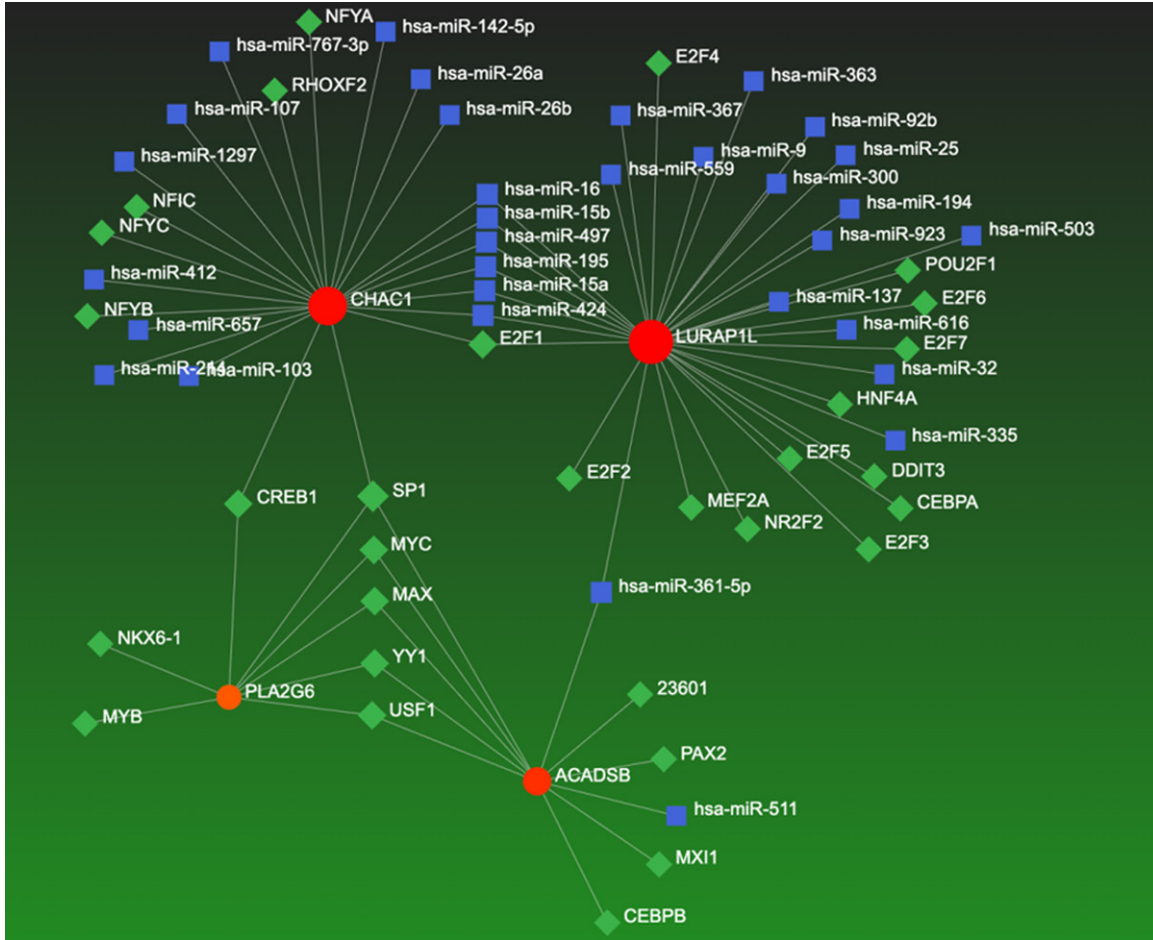

**Supplementary Figure 1.** The network depicts the TF-miRNA coregulatory network. It consists of 66 nodes and 77 edges, including 29 TF-genes, 32 miRNAs, and 4 expressed genes. The nodes in red are the model expressed genes, the blue nodes represent miRNA, and the green nodes indicate TF-genes.
